# Supplementary material for: Development of a Space Grease Lubricant with Long-Term-Storage Properties
Source: MDPI journal article supplement (doi:10.3390/lubricants12030072), 2024-02-24
Supplement: s1 [file s1]

Archive with 1 entries (1 files):
- lubricants-2862730-supplementary.pdf
